# Supplementary material for: Abortion storm of Yili Horses is Associated with Equus Caballus Papillomavirus 2 Variant Infection
Source: Research Square preprint supplement (doi:10.21203/rs.3.rs-1039587/v1), 2021-11-12
Supplement: Supplementary file 1 [file 5dfdf5095f90b05241a0af75.docx]

Table S2 Primers for the amplification of the whole genome sequence of EcPV-2 in this study

| **Primer** | **Sequence (5′-3′)** | **Product size (bp)** |
| --- | --- | --- |
| EcPV-2 F-81 | GCAGACTGGGTCTTTGTGAGTCAG | 1 758 |
| EcPV-2 R-1839 | GATACCAAAAGAGACCCACAACCAC |
| EcPV-2 F-1808 | GCGCAGTGTGGTTGTGGGTCTC | 972 |
| EcPV-2 R-2776 | GGTTCTCCATCGTCTCCCTCGTC |
| EcPV-2 F-2754 | GACGAGGGAGACGATGGAGAACC | 1 092 |
| EcPV-2 R-3846 | GCTGTGGCTCTTTTTCAGTCTGTAG |
| EcPV-2 F-3820 | CGCTACAGACTGAAAAAGAGCCAC | 942 |
| EcPV-2 R-4762 | GCTCAGCAGCTCTACCTGAAAAGC |
| EcPV-2 F-4712 | GTTAGCCGCAGTCAATTCCACAACC | 1 170 |
| EcPV-2 R-5882 | CCTGTACTGATTAGAGGACACCTTG |
| EcPV-2 F-5684 | GACAATGAACAGACAACACCTGTAC | 1 327 |
| EcPV-2 R-7011 | GCCAAAAGGTTAGCTTAGCGGGCTG |
| EcPV-2 F-6990 | CCCGCTAAGCTAACCTTTTGGCAG | 974 |
| EcPV-2 R-162 | GATTGTGGTCCACAACAATCTTCTC |
